# Supplementary material for: Comparison of Surgical Approaches for Pectus Excavatum in Children and Adolescents: A Single-Center Retrospective Study
Source: Research Square preprint supplement (doi:10.21203/rs.3.rs-8514128/v1), 2026-01-16
Supplement: Supplementary file 1 [file 2468b3fa9411889e3a41164c.pdf]

## 伦理审查批件

## Approval Letter

上海市儿童医院伦理委员会审查批件

批件号：2024R125-E01

Approval Letter of Ethics Review Committee, Children's Hospital of Shanghai

/ Shanghai Children's Hospital, Shanghai Jiao Tong University Approval No: 2024R125-E01

|                            |                                                                                                                                                                                                                    |
|----------------------------|--------------------------------------------------------------------------------------------------------------------------------------------------------------------------------------------------------------------|
| 审查日期<br>Meeting Date       | 2024年10月07日                                                                                                                                                                                                        |
| 审查会议地点<br>Meeting Location | 上海市儿童医院<br>Children's Hospital of Shanghai / Shanghai Children's Hospital,<br>Shanghai Jiao Tong University                                                                                                        |
| 研究项目名称<br>Protocol Title   | 儿童普胸微创手术病人的临床研究分析                                                                                                                                                                                                  |
| 项目编号<br>Protocol No.       | 2024R125                                                                                                                                                                                                           |
| 审查文件<br>Documents reviewed | 科研项目形式审查工作表 (2024. 7. 1)<br>研究者发起研究伦理初审文件清单 (2024. 6)<br>上海市儿童医院投稿文章材料真实性保证声明<br>科研伦理申请流程 (沈立)<br>伦理审查申请表(2023. 12. 1更新)<br>上海市儿童医院自选课题申请书 (沈立)<br>免知情同意申请书<br>生物样本信息数据来源信息证明<br>研究者履历<br>研究成果的发布形式<br>数据获取申请表(新版) |
| 申办者<br>Sponsor             | 上海市儿童医院                                                                                                                                                                                                            |
| 临床研究机构<br>Clinical Study   | 上海市儿童医院心胸外科                                                                                                                                                                                                        |

|                                       |                                                                                                                                                                                                                                                                                                                                                                                                                                                                                                                                                                                                                                                                                                           |                                 |                     |
|---------------------------------------|-----------------------------------------------------------------------------------------------------------------------------------------------------------------------------------------------------------------------------------------------------------------------------------------------------------------------------------------------------------------------------------------------------------------------------------------------------------------------------------------------------------------------------------------------------------------------------------------------------------------------------------------------------------------------------------------------------------|---------------------------------|---------------------|
| Unit                                  |                                                                                                                                                                                                                                                                                                                                                                                                                                                                                                                                                                                                                                                                                                           |                                 |                     |
| 研究负责人<br>Principal Investigator       | 沈立                                                                                                                                                                                                                                                                                                                                                                                                                                                                                                                                                                                                                                                                                                        |                                 |                     |
| 伦理审查方式<br>Review Manner               | <input type="checkbox"/> 会议审查 Full Board Review (初始审查)<br><input checked="" type="checkbox"/> 简易审查/快速审查 Expedited Review (初始审查)<br><input type="checkbox"/> 免除审查 Exemption Review (初始审查)                                                                                                                                                                                                                                                                                                                                                                                                                                                                                                                  |                                 |                     |
| 审查委员<br>Review Members with Expertise | 姓名 Name                                                                                                                                                                                                                                                                                                                                                                                                                                                                                                                                                                                                                                                                                                   | 职业背景<br>Profession & Experience | 委员角色 Role (注明非机构委员) |
|                                       | 谢华                                                                                                                                                                                                                                                                                                                                                                                                                                                                                                                                                                                                                                                                                                        | 儿外科                             | 委员                  |
|                                       | 王臻                                                                                                                                                                                                                                                                                                                                                                                                                                                                                                                                                                                                                                                                                                        | 教育管理                            | 委员 (非机构委员)          |
| 审查决定<br>Review Decision               | <input checked="" type="checkbox"/> 同意 Approved<br><input type="checkbox"/> 必要的修改后同意(简易/快速审查) Approved with Recommendation: Expedited Review<br><input type="checkbox"/> 必要的修改后同意(会议审查) Approved with Recommendation: Full Board Review<br><input type="checkbox"/> 不同意 Disapproved<br><input type="checkbox"/> 终止或者暂停已同意的研究 Termination / Suspension<br>其他:<br><input type="checkbox"/> 按原方案进行研究 Research under the original protocol<br><input type="checkbox"/> 暂停受试者入组 Suspension of subjects<br>注意 (请仔细阅读):<br>1. 临床研究应遵循我国《涉及人的生物医学研究伦理审查办法》、《药物临床试验质量管理规范》、《药物临床试验伦理审查工作指导原则》、《医疗器械临床试验质量管理规范》以及 WMA《赫尔辛基宣言》、CIOMS《人体生物医学研究国际道德指南》、ICH GCP等相关法律法规的最新版本的规定。<br>2. 本临床试验应在批准之日起一年内实施,逾期未实施的,本批件自行废止。 |                                 |                     |

|                                              |                                                                                                                                                                                                                                                                                                                                                                                                                                                     |
|----------------------------------------------|-----------------------------------------------------------------------------------------------------------------------------------------------------------------------------------------------------------------------------------------------------------------------------------------------------------------------------------------------------------------------------------------------------------------------------------------------------|
|                                              | <p>3. 涉及人类遗传资源采集、收集、买卖、出口、出境的研究项目，须在获得人类遗传资源办公室的批件后开展。</p> <p>4. 研究过程中若变更主要研究者，对临床研究方案、知情同意书、招募材料等任何修改，请提交修正案审查申请。</p> <p>5. 研究过程中发生严重不良事件，请及时递交严重不良事件报告，当出现任何可能显著影响试验进行、或增加受试者危险的情况时，请及时向伦理委员会提出书面报告。</p> <p>6. 纳入不符合纳入标准的受试者；研究过程中，符合提前终止的研究标准而没有让受试者退出；给予受试者错误的治疗或不正确的剂量；给予受试者方案禁用的合并用药等没有遵从方案开展研究的情况，请及时递交违背方案报告。</p> <p>7. 暂停或提前终止临床试验，需及时提交暂停/终止研究报告。</p> <p>8. 根据伦理委员会对跟踪审查频率的意见，请在批件失效前1个月递交年度/定期跟踪审查申请。</p> <p>9. 研究结束时，须向伦理委员会提交结题报告。</p> |
| 伦理审查意见<br>通知<br>Notification                 | <div><input type="checkbox"/> 附Attachment</div> <div><input checked="" type="checkbox"/> 无N/A</div>                                                                                                                                                                                                                                                                                                                                                 |
| 伦理审查批件<br>有效期<br>Validity of The<br>Approval | 2024年10月07日 - 2025年10月06日                                                                                                                                                                                                                                                                                                                                                                                                                           |
| 伦理委员会联<br>系电话 Tel                            | 021- 52976581                                                                                                                                                                                                                                                                                                                                                                                                                                       |
| 伦理委员会主<br>任签字<br>Chairman (signature)        | 吕志宝                                                                                                                                                                                                                                                                                                                                                                                                                                                 |
| 伦理委员会盖<br>章<br>Ethics Review                 |                                                                                                                                                                                                                                                                                                                                                                                                                                                     |

|                  |             |
|------------------|-------------|
| Committee (seal) |             |
| 日期Date           | 2024年10月07日 |

数据获取内容审查意见

伦理委员会同意本项目在研究过程中能够获取的数据内容如下：

- 1、研究受试者数或数据获取病例：1
- 2、数据入选标准：见方案
- 3、数据来源时间段：2023. 6. 30-2024. 8. 1
- 4、数据内容获取明细：

|           |                                                                               |
|-----------|-------------------------------------------------------------------------------|
| 1) 基本就诊信息 | <input checked="" type="checkbox"/> 门诊 <input checked="" type="checkbox"/> 住院 |
| 2) 医嘱信息   | <input type="checkbox"/> 门诊处方 <input checked="" type="checkbox"/> 住院医嘱        |
| 3) 诊断信息   | <input checked="" type="checkbox"/>                                           |
| 4) 检验信息   | <input checked="" type="checkbox"/>                                           |
| 5) 检查信息   | <input checked="" type="checkbox"/>                                           |
| 6) 手术信息   | <input checked="" type="checkbox"/>                                           |
| 7) 病历信息   | <input checked="" type="checkbox"/>                                           |
| 8) 体征信息   | <input checked="" type="checkbox"/>                                           |

受试者隐私信息的管理：医疗信息、病历资料请编码管理，且不能包含任何可关联到个人的任何可识别信息（姓名、出生日期、学校、家庭地址、电话、病例资料号、社保卡号、生物识别信息等）。研究数据请在研究结束后以书面文字及电子档案形式保存5年，该数据与受试者和监护人隐私信息的关联编码由上海市儿童医院项目负责人承担双人双锁保管的责任。

本数据仅供研究者院内使用、保存及保管；任何数据提供给申办方、其他第三方，需额外经科研和临床试验管理负责人独立批准，不包含在表中。

请严格按照伦理委员会审查意见进行相关数据的获取和使用，注意个人隐私数据的管理。

本审查意见仅限于内部获取数据审核使用，不作为医院外的使用。

上海市儿童医院伦理委员会

主任委员签字：吕志宝

日期：2024-10-07
