# Supplementary material for: Comparison of Surgical Approaches for Pectus Excavatum in Children and Adolescents: A Single-Center Retrospective Study
Source: Research Square preprint supplement (doi:10.21203/rs.3.rs-8514128/v1), 2026-01-16
Supplement: Supplementary file 1 [file 09632893bad5e78502cb055b.xlsx]

## Sheet: Sheet1
Parameter	Single-Incision Group (n=31)	Non-flipping Bar Group(n=31)	p-value
Demographic characteristics
Age (months)	148.00 [108.00, 161.50]	152.00 [120.50, 166.00]	0.338
Sex
Female	1 (3.2%)	1 (3.2%)	1
Male	30 (96.8%)	30 (96.8%)
Height (cm)	154.00 [132.50, 167.00]	161.00 [144.00, 168.50]	0.248
Weight (kg)	39.50 [26.25, 44.25]	43.50 [29.50, 49.75]	0.137
Complications
Cardiac anomalies	1 (3.2%)	1 (3.2%)	1
Pulmonary abnormalities	0 (0.0%)	2 (6.5%)	0.472
Upper respiratory disorders	0 (0.0%)	0 (0.0%)	NA
Skeletal abnormalities	2 (6.5%)	0 (0.0%)	0.472
Others	0 (0.0%)	1 (3.2%)	1
Thoracic Deformity Parameters
Disease duration (months)	24.00 [12.00, 72.00]	24.00 [3.50, 60.00]	0.6
Depression length (cm)
3	2 (6.5%)	2 (6.5%)	0.986
4	3 (9.7%)	4 (12.9%)
5	16 (51.6%)	17 (54.8%)
6	3 (9.7%)	3 (9.7%)
7	2 (6.5%)	2 (6.5%)
10	3 (9.7%)	2 (6.5%)
12	1 (3.2%)	0 (0.0%)
15	1 (3.2%)	1 (3.2%)
Depression width (cm)
3	3 (9.7%)	3 (9.7%)	0.394
4	6 (19.4%)	3 (9.7%)
5	2 (6.5%)	7 (22.6%)
6	13 (41.9%)	14 (45.2%)
7	0 (0.0%)	1 (3.2%)
8	2 (6.5%)	1 (3.2%)
10	2 (6.5%)	1 (3.2%)
12	1 (3.2%)	0 (0.0%)
15	2 (6.5%)	0 (0.0%)
16	0 (0.0%)	1 (3.2%)
Depression depth (cm)
1	4 (12.9%)	0 (0.0%)	0.065
1.5	2 (6.5)	2 (6.5%)
2	20 (64.5%)	14 (45.2%)
2.5	0 (0.0%)	2 (6.5%)
3	2 (6.5%)	8 (25.8%)
4	2 (6.5%)	4 (12.9%)
5	0 (0.0%)	1 (3.2%)
6	1 (3.2%)	0 (0.0%)
Haller index (HI)	3.92 [3.38, 4.99]	4.22 [3.57, 4.78]	0.41
PCI	0.65 (0.12)	0.65 (0.12)	0.799
CWAI	1.00 [0.95, 1.04]	0.99 [0.95, 1.05]	0.678
CCI	2.06 [1.80, 2.56]	2.27 [1.85, 2.74]	0.301
Surgery-Related Indicators
Thoracoscopic assistance	2 (6.5)	4 (12.9)	0.668
Number of corrective bars	29 (93.5)	31 (100.0)	0.472
Number of screws
0	18 (58.1%)	21 (67.7%)	0.004
1	13 (41.9%)	3 (9.7%)
2	0 (0.0%)	2 (6.5%)
3	0 (0.0%)	5 (16.1%)
Number of incisions
1	29 (93.5%)	0 (0.0%)	<0.001
2	2 (6.5%)	30 (96.8%)
3	0 (0.0%)	1 (3.2%)
Operative time (minutes)	65.00 [51.00, 76.00]	78.00 [58.00, 104.50]	0.079
Postoperative Indicators
Postoperative HI	2.65 [2.20, 3.37]	2.65 [2.38, 3.00]	0.972
Postoperative PCI	0.92 [0.80, 0.94]	0.97 [0.94, 1.00]	0.145
Postoperative CCI	1.25 [1.10, 1.53]	1.27 [1.06, 1.34]	0.508
Bar retention time (months)	25.00 [24.00, 35.00]	30.00 [24.00, 35.00]	0.763
Adverse Events and Recurrence
Adverse events	5 (16.1)	6 (19.4)	0.555
Thoracic deformity	3 (9.7)	1 (3.2)	0.605
Bar displacement	0 (0.0)	1 (3.2)	1
Pulmonary complications	3 (9.7)	5 (16.1)	0.705
Poor wound healing	0 (0.0)	0 (0.0)	NA
Recurrence	3 (9.7)	1 (3.2)	0.605
